# Supplementary material
Source: PubMed Central journal article supplement (PMC166994)
Supplement: plntphys_132_2_517__1.pdf [file plntphys_132_2_517__1.pdf]

**Supplemental Table 1. List of the expressed genes in Arabidopsis pollen (5 tags or more)**

| Tag_Sequence | Abundance | UniGene ID | Description                                                                                        |
|--------------|-----------|------------|----------------------------------------------------------------------------------------------------|
| GCTGCTGAGG   | 520       | At 24742   | nuclear-encoded chloroplast stromal cyclophilin (ROC4) mRNA, complete cds                          |
| GCTGCTGAGG   | 520       | At 34811   | chromosome 3 CHR3v07142002 genomic sequence (pollen-specific protein BAN102-like protein)          |
| CAGAGTGTC    | 457       | At 22350   | (clone GBGe184) mRNA for exopolysaccharuronase                                                     |
| CAGCGCTCCA   | 393       | At 3       | mRNA for polygalacturonase                                                                         |
| TAGGTACGTT   | 369       | At 22342   | putative pectinesterase (At2g47030; F14M4.14) mRNA, complete cds                                   |
| TAGGTACGTT   | 369       | At 24875   | mRNA for pectin methyl-esterase (pme5 gene)                                                        |
| TTTCTCATTG   | 318       | At 22223   | ESTs                                                                                               |
| TTTCTCATTG   | 318       | At 36416   | chromosome 1 CHR1v07142002 genomic sequence (expressed protein)                                    |
| TGTGGACGGG   | 264       | At 42166   | chromosome 1 CHR1v07142002 genomic sequence (expressed protein)                                    |
| TCGAGGCTCC   | 238       | At 15900   | chromosome 1 CHR1v07142002 genomic sequence (putative agp1)                                        |
| TCCCTATTAA   | 208       |            |                                                                                                    |
| GGGTAAAAAT   | 197       | At 18310   | chromosome 3 CHR3v07142002 genomic sequence (putative pectate lyase)                               |
| GCTGCAGAGG   | 183       | At 44216   | ESTs, Moderately similar to pollen-specific protein BAN102-like protein                            |
| GTTCAGACTC   | 174       | At 27756   | chromosome 5 CHR5v07142002 genomic sequence (Ole e I (main olive allergen)-like protein)           |
| CAAAACGAAG   | 173       | At 35593   | chromosome 3 CHR3v07142002 genomic sequence                                                        |
| CTCAATCCGC   | 166       | At 44875   | clone 4426 mRNA, complete sequence                                                                 |
| GAGTTTAGCT   | 161       | At 28481   | unknown protein (At3g01240) mRNA, complete cds                                                     |
| GGAGGCTGTG   | 159       | At 29514   | chromosome 5 CHR5v07142002 genomic sequence (expressed protein)                                    |
| TATGGACCTC   | 157       | At 12580   | chromosome 2 CHR2v07142002 genomic sequence (putative pectinesterase)                              |
| TCCCCGTACA   | 149       |            |                                                                                                    |
| GTTTCTGGCG   | 148       | At 29756   | chromosome 5 CHR5v07142002 genomic sequence (putative protein)                                     |
| CTTATAAAC    | 143       | At 42723   | chromosome 3 CHR3v07142002 genomic sequence (hypothetical protein)                                 |
| GAGGAGTTGA   | 138       | At 20152   | chromosome 5 CHR5v07142002 genomic sequence (pectin methyl-esterase-like protein)                  |
| TCAGAACGTT   | 134       | At 7075    | chromosome 5 CHR5v07142002 genomic sequence (polygalacturonase)                                    |
| CTGTACATTG   | 133       | At 36415   | chromosome 1 CHR1v07142002 genomic sequence (expressed protein)                                    |
| GATGCAGGAG   | 129       | At 27687   | chromosome 1 CHR1v07142002 genomic sequence (protein serine/threonine phosphatase alpha, putative) |
| GATGCAGGAG   | 129       | At 41974   | chromosome 1 CHR1v07142002 genomic sequence (pectate lyase, putative)                              |
| TCTTGTGACA   | 128       |            |                                                                                                    |
| TGTTTGACTT   | 127       | At 24426   | peroxiredoxin TPx2 mRNA, complete cds                                                              |
| CAAGGAAATG   | 127       | At 172     | mRNA for shaggy-like kinase beta                                                                   |
| TGAGTGGTGG   | 126       | At 38803   | chromosome 2 CHR2v07142002 genomic sequence (expressed protein)                                    |
| TAAAAGGTGA   | 123       | At 24875   | mRNA for pectin methyl-esterase (pme5 gene)                                                        |

|            |     |    |       |                                                                                   |
|------------|-----|----|-------|-----------------------------------------------------------------------------------|
| CTCCGGCTCC | 113 | At | 43891 | chromosome 5 CHR5v07142002 genomic sequence (putative protein)                    |
| AGAGTGTTAT | 111 |    |       |                                                                                   |
| CAATGCAACG | 111 |    |       |                                                                                   |
| TCCACCCACG | 110 | At | 30848 | chromosome 5 CHR5v07142002 genomic sequence (nectarin - like protein)             |
| GATCCTGCTA | 98  |    |       |                                                                                   |
| GCACGTGGTG | 94  | At | 45253 | chromosome 1 CHR1v07142002 genomic sequence (putative transposon protein)         |
| GCTACTTCCT | 91  | At | 27768 | chromosome 5 CHR5v07142002 genomic sequence (pectin methyl-esterase-like protein) |
| CAATCCTTCC | 90  | At | 8258  | AT3g13400/MRP15_3 mRNA, complete cds                                              |
| CGAGAGCACA | 89  | At | 34199 | chromosome 4 CHR4v07142002 genomic sequence (putative calmodulin)                 |
| TGTTTGCTCT | 89  |    |       |                                                                                   |
| AAGACGAGGG | 87  |    |       |                                                                                   |
| TTCTGTTATG | 86  | At | 40793 | chromosome 3 CHR3v07142002 genomic sequence (hypothetical protein)                |
| TTTTCTTAAA | 83  |    |       |                                                                                   |
| TGAAGTTTGT | 82  | At | 24426 | peroxiredoxin TPx2 mRNA, complete cds                                             |
| TGAAGTTTGT | 82  | At | 20543 | peroxiredoxin TPx1 mRNA, complete cds                                             |
| TTGGCTGGTG | 79  | At | 35248 | chromosome 3 CHR3v07142002 genomic sequence (hypothetical protein)                |
| TTGGCTGGTG | 79  | At | 45117 | chromosome 3 CHR3v07142002 genomic sequence                                       |
| GTTCAAACTC | 78  | At | 32885 | chromosome 4 CHR4v07142002 genomic sequence (predicted protein)                   |
| CGCCTTCGCG | 77  | At | 2545  | AppB protein (AppB1) mRNA, complete cds                                           |
| CACACCCACA | 74  | At | 43123 | chromosome 3 CHR3v07142002 genomic sequence (unknown protein)                     |
| ATGCATATAC | 74  | At | 45700 | chromosome 2 CHR2v07142002 genomic sequence (hypothetical protein)                |
| GCGTTTCCCT | 74  |    |       |                                                                                   |
| TCAAATCAA  | 74  |    |       |                                                                                   |
| ATGTTGATGA | 69  | At | 35281 | chromosome 1 CHR1v07142002 genomic sequence (unknown protein)                     |
| AGGGGTATGT | 69  | At | 2691  | CBL-interacting protein kinase 12 (CIPK12) mRNA, complete cds                     |
| GAGTTTGGCT | 68  | At | 41311 | chromosome 3 CHR3v07142002 genomic sequence                                       |
| GACCAGGAGC | 65  | At | 20865 | hypersensitive-induced response protein (MQB2.6) mRNA, complete cds               |
| GACCAGGAGC | 65  | At | 38798 | chromosome 3 CHR3v07142002 genomic sequence                                       |
| ATGCTGAACA | 64  | At | 29035 | chromosome 5 CHR5v07142002 genomic sequence                                       |
| CACACCAGCA | 64  | At | 42727 | chromosome 3 CHR3v07142002 genomic sequence                                       |
| TTGCGATGTT | 64  | At | 38953 | chromosome 3 CHR3v07142002 genomic sequence                                       |
| GCAGGTTTGG | 62  | At | 41998 | chromosome 1 CHR1v07142002 genomic sequence                                       |
| TTGGATTGGC | 60  | At | 31475 | chromosome 4 CHR4v07142002 genomic sequence                                       |
| TGTACCTTGA | 60  | At | 37150 | chromosome 3 CHR3v07142002 genomic sequence                                       |
| TACTCCAAAA | 58  | At | 328   | putative alpha-tubulin protein (At1g64740) mRNA, complete cds                     |
| ACGTCGTAGT | 58  |    |       |                                                                                   |

|            |    |    |       |                                                                         |
|------------|----|----|-------|-------------------------------------------------------------------------|
| GCGAATGATA | 58 |    |       |                                                                         |
| CCGGAGACAA | 57 | At | 19124 | At1g55570/T5A14_1 mRNA, complete cds                                    |
| GAGACGTTAT | 56 |    |       |                                                                         |
| TCCACCATAA | 55 | At | 22234 | mRNA for exopolygalacturonase                                           |
| TGCCATCGGC | 55 |    |       |                                                                         |
| GAGACAGAAC | 54 | At | 36923 | chromosome 1 CHR1v07142002 genomic sequence                             |
| GAGACAGAAC | 54 | At | 7868  | AT5g58620/mzn1_70 mRNA, complete cds                                    |
| AATGTTTGAA | 53 | At | 20742 | unknown protein (At4g24350) mRNA, complete cds                          |
| GTCACAAGTG | 53 | At | 4051  | DES-1-like transmembrane protein mRNA, complete cds                     |
| AATGTTTGAA | 53 | At | 34157 | chromosome 3 CHR3v07142002 genomic sequence                             |
| AGAGATTTTC | 52 | At | 27756 | chromosome 5 CHR5v07142002 genomic sequence                             |
| ACCGCGGATA | 52 | At | 39234 | chromosome 2 CHR2v07142002 genomic sequence                             |
| ATGCATATAA | 52 | At | 41351 | chromosome 1 CHR1v07142002 genomic sequence                             |
| TTCTAACATC | 52 | At | 22234 | mRNA for exopolygalacturonase                                           |
| GAGGATTAGT | 52 |    |       |                                                                         |
| TAATTTTGTC | 50 | At | 24964 | late embryogenesis abundant protein homolog (SAG21) mRNA, partial cds   |
| GTCTACCACC | 49 | At | 43630 | chromosome 3 CHR3v07142002 genomic sequence                             |
| ACTGACTTGT | 49 | At | 37015 | At2g46360/F11C10.5 mRNA, complete cds                                   |
| TGTTCAGATG | 48 | At | 32125 | chromosome 5 CHR5v07142002 genomic sequence                             |
| TTTTTATGTA | 46 | At | 44216 | ESTs, Moderately similar to pollen-specific protein BAN102-like protein |
| ATCTCCACGA | 46 |    |       |                                                                         |
| TGGCGGTGGA | 45 | At | 40850 | chromosome 3 CHR3v07142002 genomic sequence                             |
| GATCCATTTG | 42 | At | 42564 | chromosome 1 CHR1v07142002 genomic sequence                             |
| TACGGACGGA | 42 |    |       |                                                                         |
| GAGATCAGAT | 40 | At | 22737 | putative RNA-binding protein (At5g47620) mRNA, complete cds             |
| TATTGTGTTT | 40 | At | 706   | mRNA for putative beta-galactosidase (BGAL11 gene)                      |
| GGAAACACTC | 40 | At | 29710 | chromosome 5 CHR5v07142002 genomic sequence                             |
| GTTGCTGCTT | 40 | At | 30916 | chromosome 5 CHR5v07142002 genomic sequence                             |
| TGTGGGCACT | 40 | At | 38651 | chromosome 3 CHR3v07142002 genomic sequence                             |
| TGTGGGCACT | 40 | At | 42656 | chromosome 1 CHR1v07142002 genomic sequence                             |
| GCGAAGTCGA | 40 |    |       |                                                                         |
| AAGAAGAAGA | 37 | At | 24780 | unknown protein (At2g39650) mRNA, complete cds                          |
| AACGGTGCTT | 37 | At | 31843 | chromosome 5 CHR5v07142002 genomic sequence                             |
| AAGAAGAAGA | 37 | At | 14838 | At1g07720/F24B9_16 mRNA, complete cds                                   |
| AAGACAGGAG | 36 | At | 21711 | zinc finger protein 3 (ZFN3) mRNA, complete cds                         |
| TATTCCAATA | 36 | At | 43992 | chromosome 5 CHR5v07142002 genomic sequence                             |
| GACGGTGGAG | 36 | At | 39401 | chromosome 3 CHR3v07142002 genomic sequence                             |

|             |    |    |       |                                                                                         |
|-------------|----|----|-------|-----------------------------------------------------------------------------------------|
| GACGGTGGAG  | 36 | At | 5851  | chromosome 3 CHR3v07142002 genomic sequence                                             |
| GATTGTGAAA  | 36 | At | 35078 | chromosome 3 CHR3v07142002 genomic sequence                                             |
| AGCCATTTAT  | 36 | At | 42390 | chromosome 1 CHR1v07142002 genomic sequence                                             |
| TTCTTCAGTA  | 36 | At | 20183 | AT5g55930/MYN21_4 mRNA, complete cds                                                    |
| TACCACCTCT  | 35 | At | 28482 | putative serine carboxypeptidase II (At2g05850) mRNA, complete cds                      |
| TGTCACGAG   | 35 | At | 38223 | chromosome 3 CHR3v07142002 genomic sequence                                             |
| AAACTTTTGT  | 35 |    |       |                                                                                         |
| GAAACGTTAT  | 35 |    |       |                                                                                         |
| GGTTGTGGTG  | 35 |    |       |                                                                                         |
| TCATCTGGTT  | 35 |    |       |                                                                                         |
| TTTTCTGTAA  | 34 | At | 37603 | chromosome 2 CHR2v07142002 genomic sequence                                             |
| CGTTGCACTA  | 34 |    |       |                                                                                         |
| GTTGTATTGA  | 34 |    |       |                                                                                         |
| TCTGACCGTA  | 33 | At | 30695 | chromosome 5 CHR5v07142002 genomic sequence                                             |
| TTCTTTGATG  | 33 | At | 30727 | chromosome 5 CHR5v07142002 genomic sequence                                             |
| CAAGAACTCT  | 33 | At | 35559 | chromosome 3 CHR3v07142002 genomic sequence                                             |
| TCTGACCGTA  | 33 | At | 36356 | chromosome 3 CHR3v07142002 genomic sequence                                             |
| GCCATTATGA  | 33 | At | 26579 | C7A10_870/C7A10_870 mRNA, complete cds                                                  |
| TTAATGACGC  | 33 | At | 14786 | At1g78460/F3F9_3 mRNA, complete cds                                                     |
| TTCTTTGATG  | 33 | At | 12581 | A.thaliana (ecotype Landsberg erecta) mRNA for squamosa promoter binding protein-like 1 |
| TTTTGTGCTT  | 32 | At | 29641 | chromosome 5 CHR5v07142002 genomic sequence                                             |
| TTTTGTGCTT  | 32 | At | 37415 | chromosome 3 CHR3v07142002 genomic sequence                                             |
| AGGAAAACCTG | 32 |    |       |                                                                                         |
| GATGGTTCCT  | 32 |    |       |                                                                                         |
| TAAACCTTTT  | 31 | At | 19923 | chromosome 5 CHR5v07142002 genomic sequence                                             |
| GACCCTTACC  | 31 | At | 45700 | chromosome 2 CHR2v07142002 genomic sequence                                             |
| AACGGAAAAG  | 31 |    |       |                                                                                         |
| AGGTCGTATA  | 31 |    |       |                                                                                         |
| GGCATAATAA  | 30 | At | 42700 | chromosome 3 CHR3v07142002 genomic sequence                                             |
| GGCTTGGTGG  | 30 | At | 4823  | chromosome 3 CHR3v07142002 genomic sequence                                             |
| GTTTGAAGGA  | 29 | At | 24437 | TCTP homolog (TCTP) mRNA, complete cds                                                  |
| TGAAAGCGG   | 29 | At | 28510 | putative beta-1,3-glucanase (At5g20390) mRNA, complete cds                              |
| GTCAACCTAA  | 29 | At | 3572  | fatty acid hydroxylase-like protein (T13K14.30) mRNA, complete cds                      |
| CAAACCACAA  | 29 | At | 31080 | chromosome 4 CHR4v07142002 genomic sequence                                             |
| CCAGTACCAA  | 29 | At | 38215 | chromosome 3 CHR3v07142002 genomic sequence                                             |
| GCACATATAG  | 29 | At | 40548 | chromosome 3 CHR3v07142002 genomic sequence                                             |
| TGTAATAGTA  | 29 | At | 37416 | chromosome 3 CHR3v07142002 genomic sequence                                             |
| GAAAAGGAGA  | 29 | At | 36012 | chromosome 1 CHR1v07142002 genomic sequence                                             |
| TCGAATAACT  | 29 | At | 35268 | chromosome 1 CHR1v07142002 genomic sequence                                             |
| TCTTTAAGCT  | 29 | At | 24956 | AT5g47540/MNJ7_13 mRNA, complete cds                                                    |
| GACCGCGTTT  | 29 |    |       |                                                                                         |
| TAGGTACCGT  | 29 |    |       |                                                                                         |
| TCGAAAGCTT  | 29 |    |       |                                                                                         |

|            |    |    |       |                                                                                           |
|------------|----|----|-------|-------------------------------------------------------------------------------------------|
| ATCGCGGAAG | 28 | At | 28481 | unknown protein (At3g01240) mRNA, complete cds                                            |
| GAAGCAGCAG | 28 | At | 32348 | chromosome 5 CHR5v07142002 genomic sequence                                               |
| TGACCCCTGA | 27 | At | 25574 | S-adenosylmethionine decarboxylase (SAMdc) mRNA, complete cds                             |
| CCCGGCGGTG | 27 | At | 30773 | chromosome 5 CHR5v07142002 genomic sequence                                               |
| TACATTCTGT | 27 | At | 26829 | chromosome 4 CHR4v07142002 genomic sequence                                               |
| TTGTATCCTT | 27 | At | 34168 | chromosome 3 CHR3v07142002 genomic sequence                                               |
| TTTGTGGCCC | 27 | At | 34081 | chromosome 3 CHR3v07142002 genomic sequence                                               |
| AGACTTGCAA | 27 |    |       |                                                                                           |
| CAGTCATTC  | 26 | At | 507   | mRNA for BNH protein (T5A14.2 gene)                                                       |
| ACTTGAACT  | 26 | At | 32233 | chromosome 4 CHR4v07142002 genomic sequence                                               |
| ACGAGTGTC  | 25 | At | 41743 | chromosome 1 CHR1v07142002 genomic sequence                                               |
| CAAGAAGTAG | 25 | At | 40498 | chromosome 1 CHR1v07142002 genomic sequence                                               |
| GGAACATACG | 25 | At | 36357 | chromosome 1 CHR1v07142002 genomic sequence                                               |
| GTTGTATTAT | 25 | At | 22579 | At2g39700/F17A14.7 mRNA, complete cds                                                     |
| TCATATGAAG | 25 | At | 15579 | alanine aminotransferase (ALAAT2) mRNA, complete cds                                      |
| CAATGGTTTT | 25 |    |       |                                                                                           |
| TAAGAATCAC | 25 |    |       |                                                                                           |
| ATTCATTCGA | 24 | At | 17005 | putative nucleotide sugar epimerase (At1g02000) mRNA, complete cds                        |
| TTGAAGTAGG | 24 | At | 35647 | chromosome 1 CHR1v07142002 genomic sequence                                               |
| TTTGTTTTGT | 24 | At | 41566 | chromosome 1 CHR1v07142002 genomic sequence                                               |
| TTGTATCAAA | 24 |    |       |                                                                                           |
| ATGCTTTGTC | 23 | At | 5393  | mRNA for monogalactosyldiacylglycerol synthase                                            |
| TGAGCGATGA | 23 | At | 10348 | GDP-mannose pyrophosphorylase (GMP1) mRNA, complete cds                                   |
| GCCGTTCAGC | 23 | At | 32182 | chromosome 4 CHR4v07142002 genomic sequence                                               |
| TAATTATGTA | 23 | At | 31074 | chromosome 4 CHR4v07142002 genomic sequence                                               |
| CGAGTCAAGC | 23 | At | 42448 | chromosome 1 CHR1v07142002 genomic sequence                                               |
| AGCATTGTGG | 22 | At | 20838 | similar to Pto kinase interactor 1 gb AAC61805.1 (At1g48210; F21D18.6) mRNA, complete cds |
| CCTCTTCTGA | 22 | At | 21238 | putative kinase (At4g19110) mRNA, complete cds                                            |
| AGCATTGTGG | 22 | At | 1517  | protein kinase-like protein (At3g59350; F25L23_210) mRNA, complete cds                    |
| AACCGGTTGG | 22 | At | 28906 | chromosome 5 CHR5v07142002 genomic sequence                                               |
| AAAACTGAG  | 22 | At | 42732 | chromosome 3 CHR3v07142002 genomic sequence                                               |
| TTTCAGATGC | 22 | At | 36590 | chromosome 2 CHR2v07142002 genomic sequence                                               |
| AAACCGAGAG | 22 |    |       |                                                                                           |
| ATGTAECTCG | 22 |    |       |                                                                                           |
| TTTAATAAAT | 21 | At | 44580 | EST                                                                                       |
| TTTAATAAAT | 21 | At | 8507  | unknown protein (At5g39880) mRNA, complete cds                                            |
| AATGATCTTG | 21 | At | 22013 | putative tubulin beta-4 chain (At5g44340) mRNA, complete cds                              |
| GGGTAGGTGA | 21 | At | 19550 | putative nucleoside triphosphatase (At2g02970; T17M13.14) mRNA, complete cds              |
| AATGATCTTG | 21 | At | 28063 | chromosome 4 CHR4v07142002 genomic sequence                                               |

|            |    |    |       |                                                                  |
|------------|----|----|-------|------------------------------------------------------------------|
| AAATTGAAAT | 21 | At | 39426 | chromosome 3 CHR3v07142002 genomic sequence                      |
| GCCTAGAAAG | 21 | At | 23845 | chromosome 3 CHR3v07142002 genomic sequence                      |
| ACAAAACCGT | 21 | At | 43028 | chromosome 1 CHR1v07142002 genomic sequence                      |
| AATCCATTAG | 21 |    |       |                                                                  |
| ATGCTTCTGG | 21 |    |       |                                                                  |
| GCGAAATGGA | 20 | At | 22342 | putative pectinesterase (At2g47030; F14M4.14) mRNA, complete cds |
| GAGGCAGCAG | 20 | At | 25023 | mRNA for putative heavy metal transporter (hma4 gene)            |
| ACTCGAGCCT | 20 | At | 25548 | glutamate dehydrogenase 2 (T211_150) mRNA, complete cds          |
| ACTCGAGCCT | 20 | At | 21712 | glutamate dehydrogenase 2 (GDH2) mRNA, complete cds              |
| TTACCGTTCA | 20 | At | 33051 | chromosome 4 CHR4v07142002 genomic sequence                      |
| GTGTTGCACA | 20 | At | 43882 | chromosome 3 CHR3v07142002 genomic sequence                      |
| CAAAAGTTGT | 20 | At | 41024 | chromosome 2 CHR2v07142002 genomic sequence                      |
| TTGTGCTTGT | 20 |    |       |                                                                  |
| GCCTTCTTCA | 19 | At | 26282 | WRKY transcription factor 68 (WRKY68) mRNA, complete cds         |
| CTTGGGAAAA | 19 | At | 24530 | putative remorin protein (At2g45820) mRNA, complete cds          |
| CTTGGGAAAA | 19 | At | 21524 | putative DNA-binding protein (At3g61260) mRNA, complete cds      |
| ACCATTTTCA | 19 | At | 26444 | mRNA for STP11 protein                                           |
| TACAAATGCA | 19 | At | 44898 | mRNA for phosphatase and tensin homolog (pten1 gene)             |
| GCCTTCTTCA | 19 | At | 8492  | chromosome 5 CHR5v07142002 genomic sequence                      |
| CACCAGCTCC | 19 | At | 31532 | chromosome 4 CHR4v07142002 genomic sequence                      |
| GATCTATACG | 19 | At | 36443 | chromosome 2 CHR2v07142002 genomic sequence                      |
| CCTTCCATCA | 19 | At | 35791 | chromosome 1 CHR1v07142002 genomic sequence                      |
| GGCTGACACA | 19 | At | 24517 | calcium-dependent protein kinase (CDPK6) mRNA, complete cds      |
| GCTTAGTAGA | 19 | At | 24196 | AT5g16110 (AT5g16110/T21H19_30) mRNA, complete cds               |
| GGCTGACACA | 19 | At | 24735 | UBC9 mRNA for ubiquitin conjugating enzyme homolog               |
| GCCTCCCCAC | 19 |    |       |                                                                  |
| TAACACACGC | 19 |    |       |                                                                  |
| TACTACTTTA | 19 |    |       |                                                                  |
| GAGCTGTCCA | 18 | At | 24058 | reversibly glycosylated polypeptide-1 (AtRGP) mRNA, complete cds |
| CCCAACCTAC | 18 | At | 10506 | fatty acid hydroxylase Fah1p (FAH1) mRNA, complete cds           |
| GATTAECTCT | 18 | At | 33785 | chromosome 4 CHR4v07142002 genomic sequence                      |
| GAGTTCCTTA | 18 | At | 38211 | chromosome 2 CHR2v07142002 genomic sequence                      |
| AAAGCTCTGA | 18 | At | 23024 | AT5g58950/k19m22_150 mRNA sequence                               |
| CGAGCATAAA | 18 |    |       |                                                                  |
| AAGAATGGAG | 17 | At | 29477 | chromosome 5 CHR5v07142002 genomic sequence                      |
| TAATCCGAAA | 17 | At | 3125  | chromosome 4 CHR4v07142002 genomic sequence                      |
| GAAATATAAG | 17 | At | 8044  | chromosome 3 CHR3v07142002 genomic sequence                      |
| GGTTTCTTGA | 17 | At | 43073 | chromosome 3 CHR3v07142002 genomic sequence                      |
| CGGCGAGAAC | 17 | At | 38653 | chromosome 2 CHR2v07142002 genomic sequence                      |
| GCTGCAAATA | 17 | At | 37952 | chromosome 2 CHR2v07142002 genomic sequence                      |
| AACATACCAG | 17 | At | 18294 | chromosome 1 CHR1v07142002 genomic sequence                      |

|             |    |    |       |                                                                   |
|-------------|----|----|-------|-------------------------------------------------------------------|
| GCCCAAACAG  | 17 | At | 42624 | chromosome 1 CHR1v07142002 genomic sequence                       |
| TTATGTAATA  | 17 | At | 39569 | chromosome 1 CHR1v07142002 genomic sequence                       |
| CAACGTGTAA  | 17 | At | 20666 | AT5g67480/K9I9_4 mRNA, complete cds                               |
| ATCGTACCCA  | 17 |    |       |                                                                   |
| TGGAGCCCTT  | 17 |    |       |                                                                   |
| TGGATTATTG  | 16 | At | 2344  | unknown protein (At4g27350) mRNA, complete cds                    |
| CAAGCTCCAG  | 16 | At | 9528  | NOI protein mRNA, complete cds                                    |
| TGTAAAGAGG  | 16 | At | 39657 | chromosome 2 CHR2v07142002 genomic sequence                       |
| GAATATGCAA  | 16 | At | 43278 | chromosome 1 CHR1v07142002 genomic sequence                       |
| GGTCAGCTCA  | 16 | At | 20411 | AT5g01350/T10O8_60 mRNA, complete cds                             |
| GAATATGCAA  | 16 | At | 24531 | AT3g02420/F16B3_5 mRNA, complete cds                              |
| TGATAATGGC  | 16 | At | 19824 | At2g21540/F2G1.19 mRNA, complete cds                              |
| AACAAGAAAC  | 16 |    |       |                                                                   |
| ACATACAAGT  | 16 |    |       |                                                                   |
| ATAGTACACA  | 16 |    |       |                                                                   |
| CATCTATATA  | 16 |    |       |                                                                   |
| CCGATGTGAA  | 16 |    |       |                                                                   |
| TGTGTTTCGTT | 15 | At | 22013 | putative tubulin beta-4 chain (At5g44340) mRNA, complete cds      |
| ACCGTGCGGC  | 15 | At | 42981 | chromosome 5 CHR5v07142002 genomic sequence                       |
| AAGGTGAAGA  | 15 | At | 39206 | chromosome 3 CHR3v07142002 genomic sequence                       |
| GTCGATGACA  | 15 | At | 34959 | chromosome 3 CHR3v07142002 genomic sequence                       |
| AACAAGAACG  | 15 | At | 20602 | AT5g11760/T22P22_150 mRNA, complete cds                           |
| AGCACGTA    | 15 |    |       |                                                                   |
| GATGTGCAGC  | 15 |    |       |                                                                   |
| TCAACCAAAT  | 15 |    |       |                                                                   |
| TTCAGCTCTG  | 15 |    |       |                                                                   |
| CCTAGAGGTC  | 14 | At | 44932 | EST, Moderately similar to protein kinase interactor, putative    |
| GACAAGTTCG  | 14 | At | 27187 | unknown protein (At3g52360) mRNA, complete cds                    |
| CGACAGGAGT  | 14 | At | 10174 | transcription factor TFIB mRNA, complete cds                      |
| TGCGACTGGT  | 14 | At | 24118 | RING-H2 finger protein RHF2a mRNA, complete cds                   |
| CCTAGAGGTC  | 14 | At | 12093 | putative protein kinase interactor (At1g06700) mRNA, complete cds |
| GCCCTCGCCG  | 14 | At | 23312 | germin-like protein (GLP8) mRNA, complete cds                     |
| AATCTCTTTG  | 14 | At | 33461 | chromosome 5 CHR5v07142002 genomic sequence                       |
| GTGTTTCGTGT | 14 | At | 34406 | chromosome 4 CHR4v07142002 genomic sequence                       |
| TTCAGTTGAA  | 14 | At | 31436 | chromosome 4 CHR4v07142002 genomic sequence                       |
| TTTACTCAGT  | 14 | At | 31119 | chromosome 4 CHR4v07142002 genomic sequence                       |
| AGGGAACGTT  | 14 | At | 39990 | chromosome 3 CHR3v07142002 genomic sequence                       |

|            |    |    |       |                                                                                   |
|------------|----|----|-------|-----------------------------------------------------------------------------------|
| CCTGAGACAA | 14 | At | 39426 | chromosome 3 CHR3v07142002 genomic sequence                                       |
| GACACAGAAA | 14 | At | 40932 | chromosome 3 CHR3v07142002 genomic sequence                                       |
| CTGAGCCTGC | 14 | At | 36743 | chromosome 2 CHR2v07142002 genomic sequence                                       |
| GCTAAAAGG  | 14 | At | 36539 | chromosome 2 CHR2v07142002 genomic sequence                                       |
| TTACTCAGT  | 14 | At | 39563 | chromosome 2 CHR2v07142002 genomic sequence                                       |
| TGAATTATT  | 14 | At | 34972 | chromosome 1 CHR1v07142002 genomic sequence                                       |
| AATCTCTTTG | 14 | At | 27437 | AT5g47580/MNJ7_17 mRNA, complete cds                                              |
| ATGATTATAT | 14 | At | 18683 | AT3g05760/F10A16_5 mRNA, complete cds                                             |
| TAATGTGCAA | 14 |    |       |                                                                                   |
| TTTCCCGTCA | 14 |    |       |                                                                                   |
| GTTCTCTTTT | 13 | At | 7295  | Unknown protein (At5g43930; MRH10.2) mRNA, complete cds                           |
| GTTCTCTTTT | 13 | At | 21104 | unknown protein (At1g04140) mRNA, complete cds                                    |
| TTTTTTTGGG | 13 | At | 10194 | mRNA for dynamin-like protein ADLP1 (dlp1 gene)                                   |
| AGTGGAGATG | 13 | At | 34920 | chromosome 3 CHR3v07142002 genomic sequence                                       |
| GGTACTTACG | 13 | At | 34667 | chromosome 1 CHR1v07142002 genomic sequence                                       |
| TATTTATATG | 13 | At | 27274 | beta-D-glucan exohydrolase-like protein (At3g62710; F26K9_140) mRNA, complete cds |
| CTCCATTCTA | 13 | At | 28445 | AT3g51300/F24M12_340 mRNA, complete cds                                           |
| CCTTCTGCGC | 13 |    |       |                                                                                   |
| CTACGTTTTA | 13 |    |       |                                                                                   |
| GACTCACTAT | 13 |    |       |                                                                                   |
| GCACTTTAAG | 13 |    |       |                                                                                   |
| TATTTGAGCG | 13 |    |       |                                                                                   |
| TCCCTATAAG | 13 |    |       |                                                                                   |
| TAGAATGTTA | 12 | At | 25398 | chromosome 4 CHR4v07142002 genomic sequence                                       |
| AGTACGGTGC | 12 | At | 38491 | chromosome 3 CHR3v07142002 genomic sequence                                       |
| ATGAAGATGT | 12 | At | 43393 | chromosome 3 CHR3v07142002 genomic sequence                                       |
| CAGAAGCCTC | 12 | At | 35280 | chromosome 3 CHR3v07142002 genomic sequence                                       |
| GTGGTGGTGA | 12 | At | 37516 | chromosome 3 CHR3v07142002 genomic sequence                                       |
| ATGTCTCTCC | 12 | At | 20212 | chromosome 2 CHR2v07142002 genomic sequence                                       |
| GCTCCTTTTG | 12 | At | 42111 | chromosome 1 CHR1v07142002 genomic sequence                                       |
| TGCTCCATCT | 12 | At | 24633 | AT5g64130/MHJ24_11 mRNA, complete cds                                             |
| GGATTAAAGC | 12 | At | 9276  | AT5g56750/MIK19_22 mRNA, complete cds                                             |
| GGACGGGCTG | 12 | At | 23506 | AT5g54810/MBG8_7 mRNA, complete cds                                               |
| TGGAGCAGCA | 12 | At | 19998 | AT5g10270/F18D22_40 mRNA, complete cds                                            |
| AGTTACAAA  | 12 |    |       |                                                                                   |
| CCAGTTCTTG | 12 |    |       |                                                                                   |
| GCACAAAGCA | 12 |    |       |                                                                                   |
| TATTGGTCTG | 12 |    |       |                                                                                   |
| TTAATGCTAA | 12 |    |       |                                                                                   |
| TTGTGGCGAA | 12 |    |       |                                                                                   |
| TTTTTTTTTC | 11 | At | 20293 | EST                                                                               |
| TCCGTTGATG | 11 | At | 24187 | zinc-finger protein Lsd1 (LSD1) mRNA, complete cds                                |
| TTTCTGTAC  | 11 | At | 11485 | Unknown protein (At1g34780; F21H2.1) mRNA, complete cds                           |



|            |    |    |       |                                                                       |
|------------|----|----|-------|-----------------------------------------------------------------------|
| GGCTAAATGG | 11 | At | 23580 | putative protein (F24B22.22) mRNA, complete cds                       |
| TCCCAAAGTC | 11 | At | 707   | mRNA for putative beta-galactosidase (BGAL13 gene)                    |
| AATCTGTTTT | 11 | At | 20193 | chromosome 5 CHR5v07142002 genomic sequence                           |
| TCGATGTTGT | 11 | At | 33317 | chromosome 4 CHR4v07142002 genomic sequence                           |
| CTCTTAATAT | 11 | At | 35336 | chromosome 3 CHR3v07142002 genomic sequence                           |
| CTCTTAATAT | 11 | At | 35334 | chromosome 3 CHR3v07142002 genomic sequence                           |
| GAACAGCACG | 11 | At | 35805 | chromosome 3 CHR3v07142002 genomic sequence                           |
| TTTCTGTTAC | 11 | At | 37753 | chromosome 3 CHR3v07142002 genomic sequence                           |
| ACGATACAAG | 11 | At | 45667 | chromosome 2 CHR2v07142002 genomic sequence                           |
| GTTGTACGTT | 11 | At | 14117 | chromosome 2 CHR2v07142002 genomic sequence                           |
| TAGTGTAAG  | 11 | At | 38211 | chromosome 2 CHR2v07142002 genomic sequence                           |
| AAAAAAAAAA | 11 | At | 41626 | chromosome 1 CHR1v07142002 genomic sequence                           |
| ACCACAACAT | 11 | At | 15260 | chromosome 1 CHR1v07142002 genomic sequence                           |
| ATGTTTTAGT | 11 | At | 40920 | chromosome 1 CHR1v07142002 genomic sequence                           |
| CAACAAACAT | 11 | At | 43690 | chromosome 1 CHR1v07142002 genomic sequence                           |
| GATCCGAGTC | 11 | At | 41370 | chromosome 1 CHR1v07142002 genomic sequence                           |
| GGACTCGAGG | 11 | At | 23067 | calmodulin-3 mRNA, 3' end                                             |
| TAACAACGAT | 11 | At | 24482 | ATP dependent copper transporter (RAN1) mRNA, complete cds            |
| TCGATGTTGT | 11 | At | 10208 | atExt4 mRNA for extensin 4, complete cds                              |
| CAACAAACAT | 11 | At | 4665  | AT4g37280/C7A10_80 mRNA, complete cds                                 |
| AAAAAAAAAA | 11 | At | 20719 | AT4g27020/F10M23_360 mRNA, complete cds                               |
| TTTTTTTTTC | 11 | At | 27476 | At2g26190/T1D16.17 mRNA, complete cds                                 |
| GGCTAAATGG | 11 | At | 24357 | UBC10 mRNA for ubiquitin conjugating enzyme homolog                   |
| TGCCAGCGGA | 11 | At | 24796 | mRNA for acyl-(acyl carrier protein) thioesterase                     |
| TGCCAGCGGA | 11 | At | 24765 | mRNA for acyl-(acyl carrier protein) thioesterase                     |
| AACGAAACAA | 11 |    |       |                                                                       |
| AGAAGGGCTG | 11 |    |       |                                                                       |
| ATTTACCAAT | 11 |    |       |                                                                       |
| CAACGAGAAC | 11 |    |       |                                                                       |
| CACAAATTCC | 11 |    |       |                                                                       |
| CTCGTAGTAT | 11 |    |       |                                                                       |
| GGCTGATTGG | 11 |    |       |                                                                       |
| TAATGGAAGA | 11 |    |       |                                                                       |
| TCTACATTCA | 11 |    |       |                                                                       |
| TGCCCTGTTC | 11 |    |       |                                                                       |
| TTGCAACTTT | 11 |    |       |                                                                       |
| GATGGAGTTT | 10 | At | 20144 | ESTs                                                                  |
| GCTCCAGAGG | 10 | At | 6306  | unknown protein (At3g22750) mRNA, complete cds                        |
| TGTTCAACAA | 10 | At | 11888 | putative transcription factor (MYB103) mRNA, complete cds             |
| CAAAAAAAAA | 10 | At | 23456 | putative RNA-binding protein (At2g38610; T6A23.19) mRNA, complete cds |
| CAAAAAAAAA | 10 | At | 16552 | putative lipase (At1g10740) mRNA, complete cds                        |

|             |    |    |       |                                                                                            |
|-------------|----|----|-------|--------------------------------------------------------------------------------------------|
| GAGCTTGACG  | 10 | At | 27301 | fructose-bisphosphate aldolase-like protein (F17C15.11) mRNA, complete cds                 |
| AAATGTGATG  | 10 | At | 29229 | chromosome 5 CHR5v07142002 genomic sequence                                                |
| GAAGACGGTG  | 10 | At | 43144 | chromosome 5 CHR5v07142002 genomic sequence                                                |
| GGTTTCTCAA  | 10 | At | 32168 | chromosome 5 CHR5v07142002 genomic sequence                                                |
| GTGGCAAGAA  | 10 | At | 31838 | chromosome 5 CHR5v07142002 genomic sequence                                                |
| TAATCTTTGA  | 10 | At | 30386 | chromosome 5 CHR5v07142002 genomic sequence                                                |
| TCACAACCGT  | 10 | At | 30728 | chromosome 5 CHR5v07142002 genomic sequence                                                |
| AACTAAGGGA  | 10 | At | 33661 | chromosome 4 CHR4v07142002 genomic sequence                                                |
| GAAGCATCGC  | 10 | At | 31076 | chromosome 4 CHR4v07142002 genomic sequence                                                |
| GATACCTGTA  | 10 | At | 31657 | chromosome 4 CHR4v07142002 genomic sequence                                                |
| AAATGTGATG  | 10 | At | 35913 | chromosome 3 CHR3v07142002 genomic sequence                                                |
| TTTAATATAT  | 10 | At | 40644 | chromosome 3 CHR3v07142002 genomic sequence                                                |
| CGGTTTCTGA  | 10 | At | 37419 | chromosome 2 CHR2v07142002 genomic sequence                                                |
| TCTTCACCAC  | 10 | At | 39156 | chromosome 2 CHR2v07142002 genomic sequence                                                |
| AAATGGCTGA  | 10 | At | 35291 | chromosome 1 CHR1v07142002 genomic sequence                                                |
| ACTCCAATCT  | 10 | At | 9578  | CBL-interacting protein kinase 10 (CIPK10) mRNA, complete cds                              |
| CTCTTAAGAA  | 10 | At | 14738 | At1g79660/F20B17_9 mRNA, complete cds                                                      |
| TGTTGCCGAT  | 10 | At | 22653 | AT1g77120/T14N5.18 mRNA, complete cds                                                      |
| AAGAAGACTT  | 10 | At | 19366 | At1g68110/T23K23_4 mRNA, complete cds                                                      |
| AACTGAAATG  | 10 | At | 19124 | At1g55570/T5A14_1 mRNA, complete cds                                                       |
| TGTTGCCGAT  | 10 | At | 22295 | acetolactate synthase (T8P19.70) mRNA, complete cds                                        |
| AAACATTGTC  | 10 |    |       |                                                                                            |
| AATCGATGAT  | 10 |    |       |                                                                                            |
| ACTTGTGGAA  | 10 |    |       |                                                                                            |
| AGACTAGTCT  | 10 |    |       |                                                                                            |
| ATTATAATCC  | 10 |    |       |                                                                                            |
| CTCCTCTTCG  | 10 |    |       |                                                                                            |
| GCCCCTGCGC  | 10 |    |       |                                                                                            |
| GGCCTGGTTA  | 10 |    |       |                                                                                            |
| TAAGTATAAA  | 10 |    |       |                                                                                            |
| TCACGGTTTC  | 10 |    |       |                                                                                            |
| TGATCAGGAG  | 10 |    |       |                                                                                            |
| TGTGAGATTC  | 9  | At | 26551 | unknown protein (At4g30860) mRNA, complete cds                                             |
| GACTTCGTTC  | 9  | At | 21011 | unknown protein (At2g46260) mRNA, complete cds                                             |
| TGTTGGAAC   | 9  | At | 27454 | unknown protein (At1g01490) mRNA, complete cds                                             |
| TTTGCTCGAG  | 9  | At | 23029 | Rho GDP-dissociation inhibitor 1 mRNA, complete cds                                        |
| GCACCGGCGT  | 9  | At | 18244 | putative translation initiation factor EIF-2B alpha subunit (T10D10.19) mRNA, complete cds |
| ATCAACCTTC  | 9  | At | 21345 | putative histidine decarboxylase (At1g43710) mRNA, complete cds                            |
| CAGGACGAAA  | 9  | At | 22949 | GF14 protein phi chain mRNA, complete cds                                                  |
| GTA AAAAGAG | 9  | At | 1513  | epsin-like protein (At3g59290; F25L23_150) mRNA, complete cds                              |
| GAACCAAAGA  | 9  | At | 30168 | chromosome 5 CHR5v07142002 genomic sequence                                                |
| GAGTTTAGAC  | 9  | At | 34199 | chromosome 4 CHR4v07142002 genomic sequence                                                |

|             |   |    |       |                                                                 |
|-------------|---|----|-------|-----------------------------------------------------------------|
| GATCCCACAA  | 9 | At | 33126 | chromosome 4 CHR4v07142002 genomic sequence                     |
| GATTGATCT   | 9 | At | 2064  | chromosome 4 CHR4v07142002 genomic sequence                     |
| CAGAACCGCT  | 9 | At | 21220 | chromosome 3 CHR3v07142002 genomic sequence                     |
| CGATATTAAT  | 9 | At | 5944  | chromosome 3 CHR3v07142002 genomic sequence                     |
| GCTTACACGG  | 9 | At | 40644 | chromosome 3 CHR3v07142002 genomic sequence                     |
| GCTTTTGCTA  | 9 | At | 45148 | chromosome 3 CHR3v07142002 genomic sequence                     |
| CGTACCTTTC  | 9 | At | 40137 | chromosome 2 CHR2v07142002 genomic sequence                     |
| GAAATTTACT  | 9 | At | 38894 | chromosome 2 CHR2v07142002 genomic sequence                     |
| AAAAAGATTC  | 9 | At | 41998 | chromosome 1 CHR1v07142002 genomic sequence                     |
| AAAAGAAACA  | 9 | At | 34197 | chromosome 1 CHR1v07142002 genomic sequence                     |
| GCTACACCGA  | 9 | At | 42444 | chromosome 1 CHR1v07142002 genomic sequence                     |
| GTAAAAAGAG  | 9 | At | 42036 | chromosome 1 CHR1v07142002 genomic sequence                     |
| GCTCTTCTCG  | 9 | At | 22959 | AtPLDdelta mRNA for phospholipase D, complete cds               |
| TGTTGGAAct  | 9 | At | 27372 | AT5g03760/F17C15_180 mRNA, complete cds                         |
| GTTTGGTTGT  | 9 | At | 22579 | At2g39700/F17A14.7 mRNA, complete cds                           |
| TTTTTGACAGA | 9 | At | 107   | mRNA for proline transporter 1                                  |
| AACCAGAACG  | 9 |    |       |                                                                 |
| AACCTTTTGC  | 9 |    |       |                                                                 |
| ACGTTGTGTT  | 9 |    |       |                                                                 |
| ATAACAAAGA  | 9 |    |       |                                                                 |
| ATTAATGTGG  | 9 |    |       |                                                                 |
| GCAATTTTAT  | 9 |    |       |                                                                 |
| GTGTTTAATA  | 9 |    |       |                                                                 |
| GTTGTATTAA  | 9 |    |       |                                                                 |
| GTTTTTCTAG  | 9 |    |       |                                                                 |
| TAGAATGATA  | 9 |    |       |                                                                 |
| TATCAAATTT  | 9 |    |       |                                                                 |
| TCTTCCAAGC  | 9 |    |       |                                                                 |
| TGCCCTGCGC  | 9 |    |       |                                                                 |
| TTGCCATATA  | 9 |    |       |                                                                 |
| GTCAAAGTCA  | 8 | At | 20585 | EST                                                             |
| GCTACTTCAA  | 8 | At | 19848 | Unknown protein (At2g42780) mRNA, complete cds                  |
| TATTTTCCAT  | 8 | At | 5800  | putative zinc finger protein (PMZ) mRNA, complete cds           |
| AACATCTGCA  | 8 | At | 21524 | putative DNA-binding protein (At3g61260) mRNA, complete cds     |
| TGCCACTTCA  | 8 | At | 19615 | putative ADP-ribosylation factor (At1g23490) mRNA, complete cds |
| AGGATGCTCA  | 8 | At | 19923 | chromosome 5 CHR5v07142002 genomic sequence                     |
| GATTTGATTT  | 8 | At | 30162 | chromosome 5 CHR5v07142002 genomic sequence                     |
| TCCTTACGTG  | 8 | At | 29086 | chromosome 5 CHR5v07142002 genomic sequence                     |
| ATAACCCATT  | 8 | At | 33860 | chromosome 4 CHR4v07142002 genomic sequence                     |
| AAAAGGACCA  | 8 | At | 41075 | chromosome 3 CHR3v07142002 genomic sequence                     |
| AGACTTGAGG  | 8 | At | 40468 | chromosome 3 CHR3v07142002 genomic sequence                     |
| GATTTGATTT  | 8 | At | 27888 | chromosome 3 CHR3v07142002 genomic sequence                     |
| GCTGGGTCTG  | 8 | At | 41248 | chromosome 3 CHR3v07142002 genomic sequence                     |
| GCTTCAGTGA  | 8 | At | 42723 | chromosome 3 CHR3v07142002 genomic sequence                     |
| ACTAATCTTC  | 8 | At | 41009 | chromosome 2 CHR2v07142002 genomic sequence                     |

|             |   |    |       |                                                                   |
|-------------|---|----|-------|-------------------------------------------------------------------|
| TAAATATACT  | 8 | At | 41516 | chromosome 2 CHR2v07142002 genomic sequence                       |
| CTCCAAATGT  | 8 | At | 28182 | chromosome 1 CHR1v07142002 genomic sequence                       |
| GTCAAAGTCA  | 8 | At | 22404 | chromosome 1 CHR1v07142002 genomic sequence                       |
| GTGGCTTGTG  | 8 | At | 38257 | chromosome 1 CHR1v07142002 genomic sequence                       |
| TTCGCCTTGG  | 8 | At | 41908 | chromosome 1 CHR1v07142002 genomic sequence                       |
| GGGGATGAAG  | 8 | At | 23738 | AtSR1 mRNA for serine/threonine protein kinase, complete cds      |
| AAGTTTGATC  | 8 | At | 9180  | AT5g46250/MPL12_3 mRNA, complete cds                              |
| TTAGAGCAAG  | 8 | At | 28659 | AT5g13430/T22N19_80 mRNA, complete cds                            |
| ACAGTCACTT  | 8 | At | 22166 | At2g04410/T1O3.18 mRNA, complete cds                              |
| AGGGACTATG  | 8 | At | 24174 | mRNA for proline oxidase                                          |
| GCTGTTTTAT  | 8 | At | 10821 | A.thaliana (L.Heynh.) chloroplast mRNA for recombinant APS-kinase |
| GCTTCAGTGA  | 8 | At | 26    | A.thaliana (Columbia) cyc2b mRAN for cyclin 2b protein            |
| AATCCTAAGA  | 8 |    |       |                                                                   |
| AATGGTCTAG  | 8 |    |       |                                                                   |
| ATAGCTTCGA  | 8 |    |       |                                                                   |
| CAACTGCTTG  | 8 |    |       |                                                                   |
| GAAATGATCT  | 8 |    |       |                                                                   |
| GAAGCTTGTT  | 8 |    |       |                                                                   |
| GAGGTGTTGC  | 8 |    |       |                                                                   |
| GATAAGAGCG  | 8 |    |       |                                                                   |
| GCCTTCCCAA  | 8 |    |       |                                                                   |
| GGACCTTACT  | 8 |    |       |                                                                   |
| GTTGTATTGC  | 8 |    |       |                                                                   |
| TAAATACCAA  | 8 |    |       |                                                                   |
| TCTCGGTCGT  | 8 |    |       |                                                                   |
| TTATTCTGAA  | 8 |    |       |                                                                   |
| GAAC TTGACC | 7 | At | 24187 | zinc-finger protein Lsd1 (LSD1) mRNA, complete cds                |
| TCTCGTTTCA  | 7 | At | 3910  | Unknown protein mRNA, complete cds                                |
| GATTTTCGAC  | 7 | At | 42676 | unknown protein (At4g30850) mRNA, complete cds                    |
| TTGGATTATC  | 7 | At | 15456 | unknown protein (At1g05940) mRNA, complete cds                    |
| GCAAATCCTG  | 7 | At | 28360 | putative ripening-related protein (At5g59480) mRNA, complete cds  |
| GAAATGAAGC  | 7 | At | 24026 | MADS-box protein AGL18 (AGL18) mRNA, complete cds                 |
| AAAATTCAAA  | 7 | At | 29916 | chromosome 5 CHR5v07142002 genomic sequence                       |
| CATTGACCC   | 7 | At | 31778 | chromosome 5 CHR5v07142002 genomic sequence                       |
| CCGTCTCTGA  | 7 | At | 33401 | chromosome 5 CHR5v07142002 genomic sequence                       |
| TATAAAAGAA  | 7 | At | 19699 | chromosome 5 CHR5v07142002 genomic sequence                       |
| TGTGATGTGA  | 7 | At | 31671 | chromosome 5 CHR5v07142002 genomic sequence                       |
| TTCTATGAGA  | 7 | At | 28956 | chromosome 5 CHR5v07142002 genomic sequence                       |
| GATTTTCGAC  | 7 | At | 31797 | chromosome 4 CHR4v07142002 genomic sequence                       |
| CCGCTTACAA  | 7 | At | 37976 | chromosome 2 CHR2v07142002 genomic sequence                       |
| GAGGGTAGGG  | 7 | At | 37555 | chromosome 2 CHR2v07142002 genomic sequence                       |
| TTAGGGTTTA  | 7 | At | 39902 | chromosome 2 CHR2v07142002 genomic sequence                       |
| CCAATACAAA  | 7 | At | 45220 | chromosome 1 CHR1v07142002 genomic sequence                       |

|            |   |    |       |                                                                         |
|------------|---|----|-------|-------------------------------------------------------------------------|
| GGAGGCGCAG | 7 | At | 35163 | chromosome 1 CHR1v07142002 genomic sequence                             |
| TTACCACGTA | 7 | At | 45220 | chromosome 1 CHR1v07142002 genomic sequence                             |
| TGAAGCACAA | 7 | At | 9105  | AT5g51720/MIO24_14 mRNA, complete cds                                   |
| AAGGTTCTTT | 7 | At | 43759 | AT5g36940/MLF18_60 mRNA, complete cds                                   |
| GTTGGGATCA | 7 | At | 23386 | AT5g01410/T1008_120 mRNA, complete cds                                  |
| GCTTGCTGTT | 7 | At | 22368 | AT4g14960/dl3520c mRNA, complete cds                                    |
| GTAATGACAA | 7 | At | 27467 | At2g46500/F11C10.19 mRNA, complete cds                                  |
| GAGGGTAGGG | 7 | At | 42682 | At2g36420 mRNA sequence                                                 |
| TCTGATTCTT | 7 | At | 10773 | At1g77260/T14N5_19 mRNA, complete cds                                   |
| GCTTGCTGTT | 7 | At | 24393 | At1g50010/F2J10_12 mRNA, complete cds                                   |
| GCAAAGGGAA | 7 | At | 11529 | alanine:glyoxylate aminotransferase 2 homolog (AGT3) mRNA, complete cds |
| TGCCACCTCT | 7 | At | 23262 | ADP-ribosylation factor mRNA, complete cds                              |
| AACGCGCAGT | 7 |    |       |                                                                         |
| AATATCCTTC | 7 |    |       |                                                                         |
| ACTACACCTC | 7 |    |       |                                                                         |
| ATCATCCTCC | 7 |    |       |                                                                         |
| ATTAATCTTT | 7 |    |       |                                                                         |
| ATTGAATAGA | 7 |    |       |                                                                         |
| CAATGCTTAC | 7 |    |       |                                                                         |
| CGATTTTATA | 7 |    |       |                                                                         |
| CTACGGATGG | 7 |    |       |                                                                         |
| GAAACTTCTG | 7 |    |       |                                                                         |
| GAAGTTCTTT | 7 |    |       |                                                                         |
| GAGGATTCTC | 7 |    |       |                                                                         |
| GCATAATCAC | 7 |    |       |                                                                         |
| GCCACGACAC | 7 |    |       |                                                                         |
| GCTTCCTTCC | 7 |    |       |                                                                         |
| GGGAAAAGGT | 7 |    |       |                                                                         |
| GTCCGTCCAT | 7 |    |       |                                                                         |
| GTCTGGATCC | 7 |    |       |                                                                         |
| GTTTTGTGAA | 7 |    |       |                                                                         |
| GTTTTTGAT  | 7 |    |       |                                                                         |
| TAACTTGTTG | 7 |    |       |                                                                         |
| TCCCGTACAT | 7 |    |       |                                                                         |
| TCCTAAGTGT | 7 |    |       |                                                                         |
| TCTTGAAGAT | 7 |    |       |                                                                         |
| TGAGGGGAAG | 7 |    |       |                                                                         |
| TGATATGTGA | 7 |    |       |                                                                         |
| TGGCATTGGC | 7 |    |       |                                                                         |

|             |   |    |       |                                                                                                  |
|-------------|---|----|-------|--------------------------------------------------------------------------------------------------|
| TGGGACGGGT  | 7 |    |       |                                                                                                  |
| TGGTTTGAGG  | 7 |    |       |                                                                                                  |
| TGTTATGGTA  | 7 |    |       |                                                                                                  |
| TTGTTTGAAA  | 7 |    |       |                                                                                                  |
| GAATCTTCAG  | 6 | At | 25197 | ESTs                                                                                             |
| TTTCTTGAT   | 6 | At | 44220 | ESTs                                                                                             |
| TATTGCCTCC  | 6 | At | 20087 | unknown protein (At5g18650) mRNA, complete cds                                                   |
| TAAAAGCTCT  | 6 | At | 22316 | unknown protein (At5g11500) mRNA, complete cds                                                   |
| ATCATTATAA  | 6 | At | 28500 | unknown protein (At4g39870) mRNA, partial cds                                                    |
| GGAGTTATAT  | 6 | At | 28744 | Unknown protein (At2g19180; T20K24.20) mRNA, partial cds                                         |
| TGTAAGTGTA  | 6 | At | 24299 | unknown protein (At1g53320) mRNA, complete cds                                                   |
| GAGATTGAAG  | 6 | At | 11934 | putative RAS-related protein ARA-1 (At1g05810) mRNA, complete cds                                |
| TCCACCATTG  | 6 | At | 6657  | putative galactosyltransferase (At3g14960) mRNA, complete cds                                    |
| GAAACGTCAA  | 6 | At | 9326  | putative DNA-directed RNA polymerase II subunit (At5g51940) mRNA, complete cds                   |
| TAAGTACTAA  | 6 | At | 1190  | putative beta-1,3-glucanase (At3g55430) mRNA, complete cds                                       |
| AAAGATATGA  | 6 | At | 22734 | protein synthesis initiation factor 4G (EIF4G) mRNA, partial cds                                 |
| TTAAACCAGC  | 6 | At | 7874  | PRLI-interacting factor N mRNA, partial cds                                                      |
| GAAGAGATGT  | 6 | At | 120   | mRNA for delta-8 sphingolipid desaturase                                                         |
| GGAAGTCTGC  | 6 | At | 4325  | hypothetical protein, predicted mRNA                                                             |
| TTGTAAGCTT  | 6 | At | 24377 | extensin-like protein (ELP) mRNA, complete cds                                                   |
| AGTACCCGGT  | 6 | At | 24130 | cysteine protease component of protease-inhibitor complex (At5g43060; MMG4.7) mRNA, complete cds |
| AGGCTTTAGC  | 6 | At | 23125 | chromosome 5 CHR5v07142002 genomic sequence                                                      |
| ATGCAGAAGC  | 6 | At | 29648 | chromosome 5 CHR5v07142002 genomic sequence                                                      |
| ATGCAGAAGC  | 6 | At | 29799 | chromosome 5 CHR5v07142002 genomic sequence                                                      |
| GAGATTGAAG  | 6 | At | 43202 | chromosome 5 CHR5v07142002 genomic sequence                                                      |
| TTTCAATGTA  | 6 | At | 30299 | chromosome 5 CHR5v07142002 genomic sequence                                                      |
| AAAGCTGGGG  | 6 | At | 32327 | chromosome 4 CHR4v07142002 genomic sequence                                                      |
| AGGAGGACTA  | 6 | At | 22322 | chromosome 4 CHR4v07142002 genomic sequence                                                      |
| ATCATTATAA  | 6 | At | 32440 | chromosome 4 CHR4v07142002 genomic sequence                                                      |
| ATCTACATAA  | 6 | At | 34572 | chromosome 4 CHR4v07142002 genomic sequence                                                      |
| GAGGCCTCTG  | 6 | At | 33018 | chromosome 4 CHR4v07142002 genomic sequence                                                      |
| TTCCAAATAA  | 6 | At | 28037 | chromosome 4 CHR4v07142002 genomic sequence                                                      |
| TTTGGAGGAG  | 6 | At | 43017 | chromosome 4 CHR4v07142002 genomic sequence                                                      |
| TTTTGTCTGT  | 6 | At | 31113 | chromosome 4 CHR4v07142002 genomic sequence                                                      |
| ACAACCAGTT  | 6 | At | 28242 | chromosome 3 CHR3v07142002 genomic sequence                                                      |
| TCGCTTTTGA  | 6 | At | 35507 | chromosome 3 CHR3v07142002 genomic sequence                                                      |
| TCTAGATTTT  | 6 | At | 28025 | chromosome 3 CHR3v07142002 genomic sequence                                                      |
| TCTTGTCTGGG | 6 | At | 34541 | chromosome 3 CHR3v07142002 genomic sequence                                                      |
| TTTGATCCTT  | 6 | At | 22524 | chromosome 3 CHR3v07142002 genomic sequence                                                      |

|            |   |    |       |                                                   |
|------------|---|----|-------|---------------------------------------------------|
| ATGCGAGTGT | 6 | At | 13052 | chromosome 2 CHR2v07142002 genomic sequence       |
| ATGGTTCTGT | 6 | At | 41730 | chromosome 1 CHR1v07142002 genomic sequence       |
| GAGCTGAAGC | 6 | At | 22732 | chromosome 1 CHR1v07142002 genomic sequence       |
| GAGTATGCAA | 6 | At | 43684 | chromosome 1 CHR1v07142002 genomic sequence       |
| GCCCTGAGAG | 6 | At | 16172 | chromosome 1 CHR1v07142002 genomic sequence       |
| GCTACAAACA | 6 | At | 42075 | chromosome 1 CHR1v07142002 genomic sequence       |
| GGATGGGACT | 6 | At | 34033 | chromosome 1 CHR1v07142002 genomic sequence       |
| GTCCAGTTTT | 6 | At | 36376 | chromosome 1 CHR1v07142002 genomic sequence       |
| GTTTCTTTGA | 6 | At | 42643 | chromosome 1 CHR1v07142002 genomic sequence       |
| TGAACCGTGA | 6 | At | 35306 | chromosome 1 CHR1v07142002 genomic sequence       |
| CCGAAAATA  | 6 | At | 26213 | catalase 1 (CAT1) mRNA, complete cds              |
| GAAGCTGGTC | 6 | At | 21383 | AT5g41990/MJC20_9 mRNA, complete cds              |
| TTAGGGAGGA | 6 | At | 25168 | AT5g13100/T19L5_60 mRNA, complete cds             |
| ATCATAGACT | 6 | At | 26255 | AT4g30940/F6I18_150 mRNA, complete cds            |
| GTTTCTTTGA | 6 | At | 1512  | AT3g59280/F25L23_140 mRNA, complete cds           |
| AGTATTTTGT | 6 | At | 10605 | At1g79245 mRNA sequence                           |
| AAATAAGTTA | 6 | At | 24180 | At1g64230/F22C12_17 mRNA, complete cds            |
| GCTACAAACA | 6 | At | 19179 | At1g05230/YUP8H12_16 mRNA, complete cds           |
| GAAACGTCAA | 6 | At | 10173 | arginine decarboxylase (ARGdc) mRNA, complete cds |
| GAGGCCTCTG | 6 | At | 22725 | mRNA for Rab2-like protein                        |
| TGTGTGTGAA | 6 | At | 9700  | mRNA for copper transporter protein               |
| AACCCTGAGA | 6 |    |       |                                                   |
| AACGTCTGCA | 6 |    |       |                                                   |
| AAGGCCAAGG | 6 |    |       |                                                   |
| AAGTGTCTT  | 6 |    |       |                                                   |
| ACCACACCCC | 6 |    |       |                                                   |
| AGAAAGATCA | 6 |    |       |                                                   |
| AGCACCAATT | 6 |    |       |                                                   |
| AGTTCATCTT | 6 |    |       |                                                   |
| ATCTCTGGCT | 6 |    |       |                                                   |
| ATGAAACCCG | 6 |    |       |                                                   |
| ATTGTGTCGT | 6 |    |       |                                                   |
| ATTTTATCAG | 6 |    |       |                                                   |
| CACGCTGTTT | 6 |    |       |                                                   |
| CCACAAGCTA | 6 |    |       |                                                   |
| CGAGGAAAAG | 6 |    |       |                                                   |
| GCTGAAGGCA | 6 |    |       |                                                   |
| GTGGCGGAGC | 6 |    |       |                                                   |
| TACTTCAAGA | 6 |    |       |                                                   |
| TATATACGAA | 6 |    |       |                                                   |
| TGTTTAAAAA | 6 |    |       |                                                   |
| TTGTAGGAAA | 6 |    |       |                                                   |

|            |   |    |       |                                                                                        |
|------------|---|----|-------|----------------------------------------------------------------------------------------|
| TTTGGCCTAA | 6 |    |       |                                                                                        |
| GCAGGTCACC | 5 | At | 22530 | ESTs                                                                                   |
| GATGCAGCTA | 5 | At | 22407 | zinc finger-like protein (F3C22_200) mRNA, complete cds                                |
| GGTGAATTT  | 5 | At | 23589 | vacuolar H <sup>+</sup> -pumping ATPase 16 kDa proteolipid (ava-p2) mRNA, complete cds |
| TGTAGATCCA | 5 | At | 22244 | unknown protein (At3g47080) mRNA, complete cds                                         |
| AGCATTGTAC | 5 | At | 21786 | Unknown protein (At3g29180; MUO22.2) mRNA, complete cds                                |
| CCCCTGATGA | 5 | At | 6206  | unknown protein (At3g20920) mRNA, complete cds                                         |
| GACAACGAGC | 5 | At | 15712 | unknown protein (At1g22200) mRNA, complete cds                                         |
| TTTTCTTAAT | 5 | At | 22531 | ubiquitin-specific protease 23 (UBP23) mRNA, complete cds                              |
| ACTATCTTCT | 5 | At | 23531 | Skp1p homolog mRNA, complete cds                                                       |
| GGGGAGCAAT | 5 | At | 21021 | putative RING zinc finger ankyrin protein (At2g28840; F8N16.13) mRNA, complete cds     |
| GACAGCAAAC | 5 | At | 3371  | putative protein (F6G3.170) mRNA, complete cds                                         |
| GCTCGTGCCA | 5 | At | 45944 | putative casein kinase II catalytic alpha subunit (At2g23080) mRNA, complete cds       |
| AACATTAAG  | 5 | At | 23700 | protein-serine kinase mRNA, complete cds                                               |
| TCTCCCTTAG | 5 | At | 5393  | mRNA for monogalactosyldiacylglycerol synthase                                         |
| TATTTGATTA | 5 | At | 20630 | mRNA for blue copper binding-like protein                                              |
| ACAAGACCGT | 5 | At | 20152 | chromosome 5 CHR5v07142002 genomic sequence                                            |
| AGCATTGTAC | 5 | At | 30347 | chromosome 5 CHR5v07142002 genomic sequence                                            |
| CAAAGCAAGA | 5 | At | 29438 | chromosome 5 CHR5v07142002 genomic sequence                                            |
| GAGAAGAGAA | 5 | At | 30589 | chromosome 5 CHR5v07142002 genomic sequence                                            |
| GATGAGTTTA | 5 | At | 29944 | chromosome 5 CHR5v07142002 genomic sequence                                            |
| TGTGTATGTA | 5 | At | 31541 | chromosome 5 CHR5v07142002 genomic sequence                                            |
| TTAGTTCCG  | 5 | At | 31869 | chromosome 5 CHR5v07142002 genomic sequence                                            |
| TTTTGGCGTC | 5 | At | 29506 | chromosome 5 CHR5v07142002 genomic sequence                                            |
| TAATCACTTG | 5 | At | 32289 | chromosome 4 CHR4v07142002 genomic sequence                                            |
| AACTTGAAGA | 5 | At | 27950 | chromosome 3 CHR3v07142002 genomic sequence                                            |
| AGAATAGGAC | 5 | At | 40545 | chromosome 3 CHR3v07142002 genomic sequence                                            |
| ACGTTTTGGT | 5 | At | 34830 | chromosome 3 CHR3v07142002 genomic sequence                                            |
| CAAACGCATA | 5 | At | 40723 | chromosome 3 CHR3v07142002 genomic sequence                                            |
| GACAATTGCT | 5 | At | 40612 | chromosome 3 CHR3v07142002 genomic sequence                                            |
| GCGTTTCCTC | 5 | At | 36320 | chromosome 3 CHR3v07142002 genomic sequence                                            |
| GCTGTTCCAG | 5 | At | 20883 | chromosome 3 CHR3v07142002 genomic sequence                                            |
| GAGTCTCTTT | 5 | At | 39711 | chromosome 2 CHR2v07142002 genomic sequence                                            |
| GATTTATGGT | 5 | At | 23346 | chromosome 2 CHR2v07142002 genomic sequence                                            |
| GTCAATTCCA | 5 | At | 39450 | chromosome 2 CHR2v07142002 genomic sequence                                            |
| GTTAATTAGT | 5 | At | 37809 | chromosome 2 CHR2v07142002 genomic sequence                                            |
| GTTATTGATT | 5 | At | 39795 | chromosome 2 CHR2v07142002 genomic sequence                                            |
| TGAAGGGTAA | 5 | At | 21504 | chromosome 2 CHR2v07142002 genomic sequence                                            |
| TGTCATCTCC | 5 | At | 45847 | chromosome 2 CHR2v07142002 genomic sequence                                            |
| AACTTGAAGA | 5 | At | 43430 | chromosome 1 CHR1v07142002 genomic sequence                                            |
| GAGAAGAGAA | 5 | At | 43317 | chromosome 1 CHR1v07142002 genomic sequence                                            |



|             |   |    |       |                                                      |
|-------------|---|----|-------|------------------------------------------------------|
| GAGGAACTAA  | 5 | At | 26858 | chromosome 1 CHR1v07142002 genomic sequence          |
| GATGAGTTTA  | 5 | At | 36535 | chromosome 1 CHR1v07142002 genomic sequence          |
| GGAGGTGGTC  | 5 | At | 41409 | chromosome 1 CHR1v07142002 genomic sequence          |
| GTC AATTCCA | 5 | At | 43516 | chromosome 1 CHR1v07142002 genomic sequence          |
| GTTTAGATAA  | 5 | At | 38846 | chromosome 1 CHR1v07142002 genomic sequence          |
| TCTAGATTGG  | 5 | At | 35502 | chromosome 1 CHR1v07142002 genomic sequence          |
| TCGTATGGCG  | 5 | At | 7426  | AT5g40720/MNF13_240 mRNA, complete cds               |
| AGACAGGAAG  | 5 | At | 21204 | At4g35590/C7A10_670 mRNA, complete cds               |
| ACCACCTGAA  | 5 | At | 2505  | AT4g22590/F7K2_170 mRNA sequence                     |
| TGAGTTAAGT  | 5 | At | 26390 | At3g09760/F8A24.19 mRNA, complete cds                |
| GTGGTAACGG  | 5 | At | 43731 | At2g16590/F1P15.3 mRNA sequence                      |
| ATTTTTTTTG  | 5 | At | 14903 | At1g01770 mRNA sequence                              |
| AAGATGAACT  | 5 | At | 15579 | alanine aminotransferase (ALAAT2) mRNA, complete cds |
| AAGCTTCTTC  | 5 | At | 24189 | mRNA for Shaggy-like kinase tetha                    |
| GCTCCGTTTC  | 5 | At | 109   | mRNA for Rab11 protein                               |
| CGAGGAAGCA  | 5 | At | 20895 | ASK-gamma mRNA                                       |
| GAGGAACTAA  | 5 | At | 35    | A.thaliana (Columbia) Di19 mRNA                      |
| AACCTTTGGA  | 5 |    |       |                                                      |
| AAGAACATTT  | 5 |    |       |                                                      |
| AAGAACCATA  | 5 |    |       |                                                      |
| AAGTCATATT  | 5 |    |       |                                                      |
| ACAGAACCAA  | 5 |    |       |                                                      |
| AGCTCCAACA  | 5 |    |       |                                                      |
| ATCGGAGAAG  | 5 |    |       |                                                      |
| ATTATATATA  | 5 |    |       |                                                      |
| ATTCTTCAA   | 5 |    |       |                                                      |
| CACACTAAAA  | 5 |    |       |                                                      |
| CAGGTTCTAG  | 5 |    |       |                                                      |
| CTTTAGGGCT  | 5 |    |       |                                                      |
| GAGAAGCTGA  | 5 |    |       |                                                      |
| GCCAAAAAAT  | 5 |    |       |                                                      |
| GCCTCGGCTT  | 5 |    |       |                                                      |
| GCTGAATTTT  | 5 |    |       |                                                      |
| GCTGCGGGGA  | 5 |    |       |                                                      |
| GTAACA ACTA | 5 |    |       |                                                      |
| TAATTGAATA  | 5 |    |       |                                                      |
| TAGTCTCGAG  | 5 |    |       |                                                      |
| TATAATGATT  | 5 |    |       |                                                      |
| TATATATGTT  | 5 |    |       |                                                      |
| TCAGACAAAG  | 5 |    |       |                                                      |
| TCCAAATTGT  | 5 |    |       |                                                      |

|            |   |  |  |  |
|------------|---|--|--|--|
| TCCAGCCGCG | 5 |  |  |  |
| TCCTTTGCTT | 5 |  |  |  |
| TTCCGGTTCG | 5 |  |  |  |
| TTAAGAGTC  | 5 |  |  |  |
| TTGATTGT   | 5 |  |  |  |
